# Supplementary material
Source: MDPI journal article supplement (https://www.mdpi.com/2073-4395/9/11/725)
Supplement: s1 [file s1]

**Table S1.** Details of the associations and candidate genes detected in SNP- and Haplotype-based GWAS for the traits of Female/Male Flowering time (FF and MF, respectively) and Anthesis–Silking Interval (ASI) measured in inbred lines of tropical maize in two locations (Cambira and Sabaudia).

| Trait | Marker Type | Marker       | Site | Chr | Position            | p-value            | PV%   | BIN  | Gene ID                                                                                                                                  |
|-------|-------------|--------------|------|-----|---------------------|--------------------|-------|------|------------------------------------------------------------------------------------------------------------------------------------------|
| FF    | HAPLO       | HChr1B296    | C    | 1   | 5700560-5700599     | 1x10 <sup>-4</sup> | 5.8%  | 1.01 | -                                                                                                                                        |
| FF    | HAPLO       | HChr3B4481   | C    | 3   | 195855645-196072390 | 6x10 <sup>-5</sup> | 6.4%  | 3.07 | AC215860.3_FG005, GRMZM2G452529, GRMZM2G452602, GRMZM2G394973, GRMZM2G394979, GRMZM2G095084, GRMZM2G105827, GRMZM2G405722, GRMZM2G105863 |
| FF    | HAPLO       | HChr5B1434   | C    | 5   | 19144526-19144565   | 6x10 <sup>-6</sup> | 11.3% | 5.03 | GRMZM2G074898                                                                                                                            |
| FF    | HAPLO       | HChr6B444    | C    | 6   | 33144046-33144063   | 2x10 <sup>-4</sup> | 5.6%  | 6.01 | -                                                                                                                                        |
| FF    | HAPLO       | HChr6B2634   | C    | 6   | 149632662-149632710 | 1x10 <sup>-4</sup> | 5.9%  | 6.05 | -                                                                                                                                        |
| FF    | HAPLO       | HChr7B4106   | C    | 7   | 173192895-173192901 | 9x10 <sup>-6</sup> | 6.4%  | 7.05 | GRMZM2G149040                                                                                                                            |
| FF    | HAPLO       | HChr8B960    | C    | 8   | 25255081-25255885   | 2x10 <sup>-4</sup> | 7.8%  | 8.03 | -                                                                                                                                        |
| FF    | HAPLO       | HChr8B961    | C    | 8   | 25255915-25291858   | 1x10 <sup>-4</sup> | 7.7%  | 8.03 | -                                                                                                                                        |
| FF    | HAPLO       | HChr8B2348   | C    | 8   | 137161389-137164401 | 2x10 <sup>-4</sup> | 5.7%  | 8.05 | GRMZM2G351813, GRMZM2G351796                                                                                                             |
| FF    | HAPLO       | HChr9B2937   | C    | 9   | 141567271-141568437 | 7x10 <sup>-5</sup> | 6.1%  | 9.06 | GRMZM2G180539                                                                                                                            |
| FF    | HAPLO       | HChr9B2943   | C    | 9   | 141786325-141789645 | 6x10 <sup>-6</sup> | 17.0% | 9.06 | -                                                                                                                                        |
| FF    | HAPLO       | HChr3B3430   | S    | 3   | 173130247-173130271 | 5x10 <sup>-5</sup> | 8.6%  | 3.06 | -                                                                                                                                        |
| FF    | HAPLO       | HChr3B4555   | S    | 3   | 199609864-199609873 | 1x10 <sup>-4</sup> | 6.3%  | 3.07 | -                                                                                                                                        |
| FF    | HAPLO       | HChr9B3470   | S    | 9   | 152254172-152254189 | 1x10 <sup>-4</sup> | 6.5%  | 9.07 | GRMZM2G358931                                                                                                                            |
| FF    | SNP         | S2_110828233 | C    | 2   | 110828233           | 2x10 <sup>-5</sup> | 5.7%  | 2.05 | GRMZM2G433912, GRMZM2G433927                                                                                                             |
| FF    | SNP         | S2_243989901 | C    | 2   | 243989901           | 1x10 <sup>-5</sup> | 6.1%  | 2.1  | -                                                                                                                                        |
| FF    | SNP         | S3_383255    | C    | 3   | 383255              | 3x10 <sup>-5</sup> | 5.6%  | 3    | GRMZM2G383240                                                                                                                            |
| FF    | SNP         | S6_155078868 | C    | 6   | 155078868           | 2x10 <sup>-5</sup> | 5.9%  | 6.06 | GRMZM2G145670, GRMZM2G145668                                                                                                             |
| FF    | SNP         | S7_18795074  | C    | 7   | 18795074            | 3x10 <sup>-5</sup> | 5.6%  | 7.02 | -                                                                                                                                        |

|    |       |              |   |   |                         |                    |       |      |                                                                                                         |
|----|-------|--------------|---|---|-------------------------|--------------------|-------|------|---------------------------------------------------------------------------------------------------------|
| FF | SNP   | S7_18795075  | C | 7 | 18795075                | 3x10 <sup>-5</sup> | 5.6%  | 7.02 | -                                                                                                       |
| FF | SNP   | S7_173192895 | C | 7 | 173192895               | 1x10 <sup>-5</sup> | 6.3%  | 7.05 | -                                                                                                       |
| FF | SNP   | S7_173192901 | C | 7 | 173192901               | 1x10 <sup>-5</sup> | 6.3%  | 7.05 | -                                                                                                       |
| FF | SNP   | S8_25254594  | C | 8 | 25254594                | 1x10 <sup>-5</sup> | 6.2%  | 8.03 | -                                                                                                       |
| FF | SNP   | S9_141567271 | C | 9 | 141567271               | 2x10 <sup>-5</sup> | 5.7%  | 9.06 | -                                                                                                       |
| FF | SNP   | S2_14924919  | S | 2 | 14924919                | 2x10 <sup>-5</sup> | 6.6%  | 2.02 | -                                                                                                       |
| FF | SNP   | S3_53249405  | S | 3 | 53249405                | 4x10 <sup>-6</sup> | 7.6%  | 3.04 | GRMZM2G108245                                                                                           |
| FF | SNP   | S5_15734151  | S | 5 | 15734151                | 1x10 <sup>-6</sup> | 8.8%  | 5.03 | AC197122.3_FG003                                                                                        |
| FF | SNP   | S5_199354625 | S | 5 | 199354625               | 1x10 <sup>-5</sup> | 7.0%  | 5.06 | -                                                                                                       |
| FF | SNP   | S5_220035046 | S | 5 | 220035046               | 1x10 <sup>-7</sup> | 10.1% | 5.09 | -                                                                                                       |
| FF | SNP   | S6_136612880 | S | 6 | 136612880               | 2x10 <sup>-5</sup> | 6.5%  | 6.05 | GRMZM2G176995                                                                                           |
| FF | SNP   | S6_159100882 | S | 6 | 159100882               | 9x10 <sup>-6</sup> | 7.0%  | 6.06 | -                                                                                                       |
| MF | HAPLO | HChr2B163    | C | 2 | 2058558-<br>2058559     | 2x10 <sup>-5</sup> | 5.9%  | 2.01 | GRMZM2G040513,<br>GRMZM2G508373,<br>GRMZM2G508378,<br>GRMZM2G508382,<br>GRMZM2G508383,<br>GRMZM2G508386 |
| MF | HAPLO | HChr4B2525   | C | 4 | 169784106-<br>169784201 | 1x10 <sup>-4</sup> | 4.6%  | 4.06 | -                                                                                                       |
| MF | HAPLO | HChr7B822    | C | 7 | 21930346-<br>21930371   | 1x10 <sup>-4</sup> | 5.9%  | 7.02 | GRMZM2G399090                                                                                           |
| MF | HAPLO | HChr8B960    | C | 8 | 25255081-<br>25255885   | 1x10 <sup>-4</sup> | 7.8%  | 8.03 | -                                                                                                       |
| MF | HAPLO | HChr8B961    | C | 8 | 25255915-<br>25291858   | 2x10 <sup>-4</sup> | 7.1%  | 8.03 | -                                                                                                       |
| MF | HAPLO | HChr9B2937   | C | 9 | 141567271-<br>141568437 | 1x10 <sup>-5</sup> | 7.4%  | 9.06 | GRMZM2G180539                                                                                           |
| MF | HAPLO | HChr9B2943   | C | 9 | 141786325-<br>141789645 | 1x10 <sup>-4</sup> | 13.0% | 9.06 | -                                                                                                       |
| MF | HAPLO | HChr1B1930   | S | 1 | 40098787-<br>40099894   | 6x10 <sup>-5</sup> | 6.8%  | 1.03 | -                                                                                                       |
| MF | HAPLO | HChr1B6984   | S | 1 | 273002190-<br>273002223 | 9x10 <sup>-5</sup> | 6.6%  | 1.1  | GRMZM2G027059                                                                                           |
| MF | HAPLO | HChr4B81     | S | 4 | 1716333-<br>1716337     | 8x10 <sup>-5</sup> | 6.9%  | 4.01 | AC193450.3_FG003                                                                                        |
| MF | HAPLO | HChr4B1083   | S | 4 | 37276130-<br>37276144   | 9x10 <sup>-5</sup> | 6.6%  | 4.05 | -                                                                                                       |
| MF | HAPLO | HChr4B1116   | S | 4 | 38448457-<br>38448480   | 2x10 <sup>-4</sup> | 5.0%  | 4.05 | -                                                                                                       |
| MF | HAPLO | HChr4B1127   | S | 4 | 38703250-<br>38703306   | 7x10 <sup>-5</sup> | 5.5%  | 4.05 | -                                                                                                       |
| MF | HAPLO | HChr5B2303   | S | 5 | 61807507-<br>61807676   | 5x10 <sup>-5</sup> | 6.9%  | 5.03 | -                                                                                                       |
| MF | HAPLO | HChr7B747    | S | 7 | 18795074-<br>18795075   | 5x10 <sup>-5</sup> | 5.8%  | 7.02 | -                                                                                                       |

|     |       |              |   |    |                     |                    |      |       |                                                                                                         |
|-----|-------|--------------|---|----|---------------------|--------------------|------|-------|---------------------------------------------------------------------------------------------------------|
| MF  | HAPLO | HChr7B1941   | S | 7  | 129359483-129359504 | 1x10 <sup>-4</sup> | 6.5% | 7.03  | -                                                                                                       |
| MF  | HAPLO | HChr7B3990   | S | 7  | 173192895-173192901 | 2x10 <sup>-5</sup> | 6.4% | 7.05  | -                                                                                                       |
| MF  | HAPLO | HChr8B2080   | S | 8  | 127681717-127681724 | 2x10 <sup>-5</sup> | 6.6% | 8.05  | -                                                                                                       |
| MF  | HAPLO | HChr9B295    | S | 9  | 9424411-9424433     | 2x10 <sup>-4</sup> | 6.0% | 9.01  | -                                                                                                       |
| MF  | SNP   | S2_2058558   | C | 2  | 2058558             | 2x10 <sup>-5</sup> | 5.9% | 2.01  | GRMZM2G040513,<br>GRMZM2G508373,<br>GRMZM2G508378,<br>GRMZM2G508382,<br>GRMZM2G508383,<br>GRMZM2G508386 |
| MF  | SNP   | S2_2058559   | C | 2  | 2058559             | 2x10 <sup>-5</sup> | 5.9% | 2.01  | GRMZM2G040513,<br>GRMZM2G508373,<br>GRMZM2G508378,<br>GRMZM2G508382,<br>GRMZM2G508383,<br>GRMZM2G508386 |
| MF  | SNP   | S8_25254594  | C | 8  | 25254594            | 3x10 <sup>-5</sup> | 5.7% | 8.03  | -                                                                                                       |
| MF  | SNP   | S9_141567271 | C | 9  | 141567271           | 7x10 <sup>-6</sup> | 6.4% | 9.06  | GRMZM2G180539                                                                                           |
| MF  | SNP   | S9_143018654 | C | 9  | 143018654           | 2x10 <sup>-5</sup> | 5.8% | 9.06  | -                                                                                                       |
| MF  | SNP   | S3_6927467   | S | 3  | 6927467             | 2x10 <sup>-5</sup> | 6.5% | 3.02  | GRMZM2G582236,<br>GRMZM2G166646                                                                         |
| MF  | SNP   | S3_188282435 | S | 3  | 188282435           | 1x10 <sup>-5</sup> | 6.9% | 3.06  | -                                                                                                       |
| MF  | SNP   | S3_188282437 | S | 3  | 188282437           | 1x10 <sup>-5</sup> | 6.9% | 3.06  | -                                                                                                       |
| MF  | SNP   | S5_220035046 | S | 5  | 220035046           | 1x10 <sup>-6</sup> | 8.5% | 5.09  | -                                                                                                       |
| MF  | SNP   | S6_9189800   | S | 6  | 9189800             | 1x10 <sup>-5</sup> | 6.8% | 6.01  | GRMZM2G066293                                                                                           |
| MF  | SNP   | S6_136612880 | S | 6  | 136612880           | 2x10 <sup>-5</sup> | 6.5% | 6.05  | GRMZM2G176995                                                                                           |
| ASI | HAPLO | HChr1B6409   | C | 1  | 251925038-251925041 | 7x10 <sup>-6</sup> | 7.8% | 1.09  | -                                                                                                       |
| ASI | HAPLO | HChr3B2296   | C | 3  | 124141907-124142464 | 4x10 <sup>-5</sup> | 7.3% | 3.04  | -                                                                                                       |
| ASI | HAPLO | HChr8B4259   | C | 8  | 175594539-175594540 | 3x10 <sup>-5</sup> | 5.6% | 8.09  | -                                                                                                       |
| ASI | HAPLO | HChr10B352   | C | 10 | 6072687-6072700     | 7x10 <sup>-5</sup> | 6.3% | 10.02 | GRMZM5G805685                                                                                           |
| ASI | HAPLO | HChr2B846    | S | 2  | 9591340-9591358     | 1x10 <sup>-4</sup> | 5.2% | 2.02  | GRMZM2G089294,<br>GRMZM2G089282                                                                         |
| ASI | HAPLO | HChr2B1267   | S | 2  | 15133087-15133122   | 1x10 <sup>-4</sup> | 5.4% | 2.03  | AC186904.4_FG006,<br>GRMZM2G513218,<br>GRMZM2G050262                                                    |
| ASI | HAPLO | HChr5B2742   | S | 5  | 82139555-82139874   | 4x10 <sup>-5</sup> | 9.5% | 5.04  | GRMZM2G024882,<br>GRMZM2G493589                                                                         |
| ASI | HAPLO | HChr7B262    | S | 7  | 5058537-5058542     | 8x10 <sup>-5</sup> | 5.5% | 7.01  | -                                                                                                       |

|     |       |               |   |    |                         |                    |      |       |                                 |
|-----|-------|---------------|---|----|-------------------------|--------------------|------|-------|---------------------------------|
| ASI | HAPLO | HChr7B3437    | S | 7  | 165508550-<br>165508562 | 2x10 <sup>-4</sup> | 5.1% | 7.04  | GRMZM5G898768,<br>GRMZM2G114461 |
| ASI | HAPLO | HChr8B2891    | S | 8  | 156195448-<br>156195452 | 3x10 <sup>-6</sup> | 7.9% | 8.06  | -                               |
| ASI | HAPLO | HChr9B2743    | S | 9  | 139752134-<br>139752292 | 6x10 <sup>-5</sup> | 7.2% | 9.06  | -                               |
| ASI | SNP   | S1_12442924   | C | 1  | 12442924                | 2x10 <sup>-5</sup> | 6.0% | 1.02  | GRMZM2G453001                   |
| ASI | SNP   | S1_252773206  | C | 1  | 252773206               | 3x10 <sup>-5</sup> | 5.7% | 1.09  | -                               |
| ASI | SNP   | S3_181601047  | C | 3  | 181601047               | 1x10 <sup>-5</sup> | 6.2% | 3.06  | GRMZM2G536613,<br>GRMZM5G871592 |
| ASI | SNP   | S5_183599722  | C | 5  | 183599722               | 3x10 <sup>-5</sup> | 5.7% | 5.05  | -                               |
| ASI | SNP   | S6_151596272  | C | 6  | 151596272               | 2x10 <sup>-5</sup> | 5.8% | 6.05  | -                               |
| ASI | SNP   | S7_8341449    | C | 7  | 8341449                 | 2x10 <sup>-5</sup> | 5.8% | 7.01  | -                               |
| ASI | SNP   | S8_175594539  | C | 8  | 175594539               | 3x10 <sup>-5</sup> | 5.6% | 8.09  | -                               |
| ASI | SNP   | S8_175594540  | C | 8  | 175594540               | 3x10 <sup>-5</sup> | 5.6% | 8.09  | -                               |
| ASI | SNP   | S1_271949118  | S | 1  | 271949118               | 1x10 <sup>-5</sup> | 6.7% | 1.1   | GRMZM2G068846                   |
| ASI | SNP   | S1_272219591  | S | 1  | 272219591               | 2x10 <sup>-7</sup> | 9.9% | 1.1   | -                               |
| ASI | SNP   | S3_234343045  | S | 3  | 234343045               | 1x10 <sup>-5</sup> | 6.7% | 3.1   | -                               |
| ASI | SNP   | S3_234343074  | S | 3  | 234343074               | 2x10 <sup>-5</sup> | 6.6% | 3.1   | -                               |
| ASI | SNP   | S8_156195448  | S | 8  | 156195448               | 2x10 <sup>-6</sup> | 8.2% | 8.06  | -                               |
| ASI | SNP   | S8_156195449  | S | 8  | 156195449               | 2x10 <sup>-6</sup> | 8.2% | 8.06  | -                               |
| ASI | SNP   | S8_156195452  | S | 8  | 156195452               | 2x10 <sup>-6</sup> | 8.2% | 8.06  | -                               |
| ASI | SNP   | S9_139752134  | S | 9  | 139752134               | 2x10 <sup>-5</sup> | 6.6% | 9.07  | -                               |
| ASI | SNP   | S10_137651780 | S | 10 | 137651780               | 2x10 <sup>-5</sup> | 6.5% | 10.06 | GRMZM2G455171                   |

---

Marker Type corresponds to the markers used in GWAS, Haplotype blocks (HAPLO) or SNP; Site indicates the location Cambira (C) or Sabaudia (S); Chr and Position corresponds to the chromosome number and position in base pairs of markers within chromosome, respectively; PV% percentage of the phenotype variation explained by the marker; ; BIN is an interval on the genetic map, which includes all loci between a core marker of leftmost or top to the next core marker rightmost or bottom.
